# Supplementary material for: Imputation of 3D genome structure by genetic–epigenetic interaction modeling in mice
Source: eLife. 2024 Apr 26;12:RP88222. doi: 10.7554/eLife.88222 (PMC11052574; doi:10.7554/eLife.88222)
Supplement: Supplementary file 2. [file elife-88222-supp2.xlsx]

## Sheet: Sheet1
Supplemental File 2. Counts and percentages within a database of all possible regression models where all SNPs and ATAC peaks are within +/- one TAD of the gene they interact with.
TAD-focused	Only SNP effect	Only ATAC effect	Additive effect	Interactive effect	No effect	All Models	All Models (no p cutoff)
sample database
SNPs (p < 1x10^-7)	7247	N/A	12327	11904	N/A	15248	66193
ATAC-seq peaks	N/A	487	22432	25961	N/A	53931	100751
(p < 1x10^-7)
Genes (p < 1x10^-7)	755	172	1129	1099	N/A	1223	13631
Models	47574072	20059818	16954276	14217610	52294007		151123942
Models where	750793	29117	305288	466451	0		1551649
p < 1x10^-7
% Models where	0.0158	0.0015	0.018	0.0328	0		0.0103
p < 1x10^-7
