# Supplementary material for: Imputation of 3D genome structure by genetic–epigenetic interaction modeling in mice
Source: eLife. 2024 Apr 26;12:RP88222. doi: 10.7554/eLife.88222 (PMC11052574; doi:10.7554/eLife.88222)
Supplement: Supplementary file 3. — In additive and interacting models, we include the percent of models in which the genotypic variant and ATAC peak are closer to each other than to the gene they affect. [file elife-88222-supp3.xlsx]

## Sheet: Sheet1
Supplemental File 3. Counts and percentages of genotypic variants and ATAC-seq peaks within +/- 2 Mb of the gene they are imputed to affect. In additive and interacting models, we include the percent of models in which the genotypic variant and ATAC peak are closer to each other than to the gene they affect.
Chr	gene ~ geno		gene ~ ATAC		gene ~ geno + ATAC					gene ~ geno + ATAC + geno:ATAC
	geno within +/- 2 Mb	% of total	ATAC within +/- 2 Mb	% of total	geno within +/- 2 Mb	% of total	ATAC within +/- 2 Mb	% of total	% proximal to each other?	geno within +/- 2 Mb	% of total	ATAC within +/- 2 Mb	% of total	% proximal to each other?
chr_1	709	54.16	4	80	117	54.17	6	2.78	3.24	126	45.49	15	5.42	10.11
chr_10	345	43.56	0	0	54	39.42	9	6.57	3.65	53	50.48	4	3.81	3.81
chr_11	508	62.95	0	0	75	63.56	10	8.47	0.85	101	54.01	10	5.35	8.02
chr_12	203	64.24	1	100	34	59.65	1	1.75	0	15	41.67	5	13.89	13.89
chr_13	246	57.34	3	100	48	55.17	7	8.05	4.6	52	36.88	10	7.09	14.18
chr_14	282	43.79	56	71.79	55	43.65	23	18.25	6.35	39	22.94	45	26.47	8.24
chr_15	207	65.3	0	0	51	72.86	4	5.71	2.86	26	50.98	6	11.76	7.84
chr_16	218	53.56	0	0	40	44.94	4	4.49	3.37	27	39.71	3	4.41	10.29
chr_17	400	55.94	4	50	95	53.37	14	7.87	4.49	62	47.33	17	12.98	7.63
chr_18	97	43.5	0	0	27	52.94	4	7.84	5.88	18	29.03	4	6.45	8.06
chr_19	98	58.68	2	100	21	63.64	5	15.15	15.15	24	63.16	4	10.53	10.53
chr_2	1251	48.77	75	75.76	175	44.08	46	11.59	6.8	209	39.36	79	14.88	8.1
chr_3	449	46	2	50	111	45.87	7	2.89	4.96	75	38.46	7	3.59	14.87
chr_4	642	57.22	4	100	162	67.78	13	5.44	1.67	95	51.63	8	4.35	4.89
chr_5	709	53.63	2	66.67	139	55.16	8	3.17	2.78	92	40	10	4.35	5.22
chr_6	266	47.58	0	0	32	49.23	3	4.62	6.15	38	33.63	7	6.19	10.62
chr_7	493	53.41	4	80	108	59.67	6	3.31	3.31	77	48.43	4	2.52	5.03
chr_8	221	58.47	15	68.18	38	46.91	7	8.64	2.47	51	43.97	19	16.38	6.03
chr_9	278	58.77	3	100	52	57.78	5	5.56	4.44	35	44.87	7	8.97	14.1
chr_X	0	0	0	0	0	0	0	0	0	0	0	0	0	0
Totals	7622	51.34	175	52.12	1434	51.49	182	6.61	0.0415	1215	41.1	264	8.47	8.57
