# Supplementary material for: Imputation of 3D genome structure by genetic–epigenetic interaction modeling in mice
Source: eLife. 2024 Apr 26;12:RP88222. doi: 10.7554/eLife.88222 (PMC11052574; doi:10.7554/eLife.88222)
Supplement: Supplementary file 5. [file elife-88222-supp5.xlsx]

## Sheet: Sheet1
Supplemental File 5. Chromosome comparison of percentages of interacting ATAC-seq peaks in transcripts versus in enhancers
	In Exons	In Exon 1	In Enhancers	In Promoters	Anywhere Else
Count	8837	3913	1473	6116	8105
Percentage	0.3404	0.1507	0.0567	0.2356	0.3122
Density per bp	1.384	0.201	0.053	14.75	0
