# Supplementary material for: Imputation of 3D genome structure by genetic–epigenetic interaction modeling in mice
Source: eLife. 2024 Apr 26;12:RP88222. doi: 10.7554/eLife.88222 (PMC11052574; doi:10.7554/eLife.88222)
Supplement: Supplementary file 6. [file elife-88222-supp6.xlsx]

## Sheet: Sheet1
Supplemental File 6. Model percentages calculated by distribution of effect signs for all significant interacting models.
Effect	Effect sign (all interacting models, adj. p < 1x10^-7)
ATAC-seq	+	+	+	+	-	-	-	-
SNP	+	+	-	-	+	+	-	-
Interaction	+	-	+	-	+	-	+	-
% of total	0.1644	0.2776	0.1075	0.0433	0.1239	0.1626	0.1178	0.003
